# Supplementary material
Source: MDPI journal article supplement (https://www.mdpi.com/2311-553X/8/1/2)
Supplement: s1 [file s1]

Supplementary Figure S1

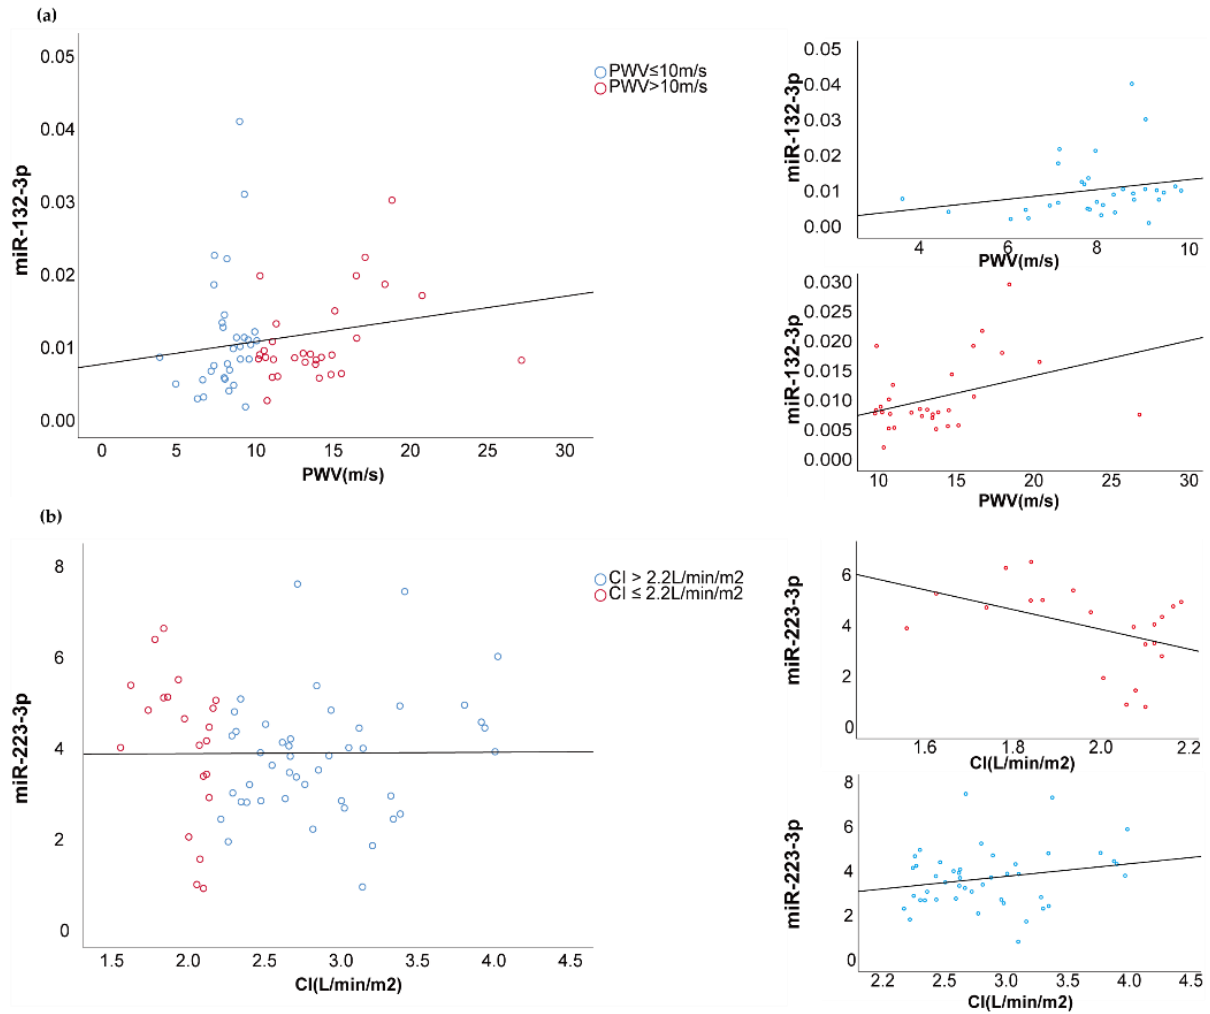

**Supplementary Figure S1.** Blue dots represent better cardiovascular condition patients whose  $PWV \leq 10$  m/s or  $CI > 2.2$  L/min/m<sup>2</sup>, and red dots represent worse cardiac condition patients whose  $PWV > 10$  m/s or  $CI \leq 2.2$  L/min/m<sup>2</sup>. (a) PWV was significantly correlated with miR-132 ( $R = 0.371$ ,  $P = 0.043$ ) when  $PWV > 10$  m/s, while not existed ( $R = 0.230$ ,  $P = 0.205$ ) when  $PWV \leq 10$  m/s. (b) CI was negatively correlated with miR-223 ( $R = -0.440$ ,  $P = 0.046$ ) within the group with a  $CI \leq 2.2$  L/min/m<sup>2</sup>. There is no significant correlation between CI and miR-223 ( $R = 0.220$ ,  $P = 0.147$ ) when  $CI > 2.2$  L/min/m<sup>2</sup>.

Supplementary Table S1. Correlations between vascular injury markers and cardiovascular function parameters within dichotomized groups.

|         | <b>Pulse wave velocity <math>\leq 10</math> m/s</b>            |         | <b>Pulse wave velocity <math>&gt; 10</math> m/s</b>            |         |
|---------|----------------------------------------------------------------|---------|----------------------------------------------------------------|---------|
|         | <b>n = 35</b>                                                  |         | <b>n = 32</b>                                                  |         |
|         | R                                                              | P value | R                                                              | P value |
| ADMA    | 0.062                                                          | 0.725   | -0.075                                                         | 0.681   |
| ANG2    | 0.016                                                          | 0.931   | 0.583                                                          | 0.001** |
| miR-126 | -0.023                                                         | 0.893   | 0.019                                                          | 0.916   |
| miR-132 | 0.230                                                          | 0.205   | 0.371                                                          | 0.043*  |
| miR-192 | 0.016                                                          | 0.931   | 0.224                                                          | 0.233   |
| miR-223 | -0.233                                                         | 0.178   | -0.225                                                         | 0.215   |
| miR-27  | -0.232                                                         | 0.187   | -0.379                                                         | 0.033*  |
| miR-29  | 0.085                                                          | 0.626   | 0.102                                                          | 0.578   |
| miR-326 | 0.163                                                          | 0.366   | 0.164                                                          | 0.425   |
|         | <b>Ejection fraction <math>\geq 50</math> %</b>                |         | <b>Ejection fraction <math>&lt; 50</math> %</b>                |         |
|         | <b>n = 54</b>                                                  |         | <b>n = 13</b>                                                  |         |
|         | R                                                              | P value | R                                                              | P value |
| ADMA    | 0.045                                                          | 0.744   | 0.199                                                          | 0.515   |
| ANG2    | -0.229                                                         | 0.113   | -0.046                                                         | 0.880   |
| miR-126 | -0.104                                                         | 0.453   | 0.211                                                          | 0.488   |
| miR-132 | 0.004                                                          | 0.978   | -0.022                                                         | 0.945   |
| miR-192 | -0.027                                                         | 0.856   | 0.209                                                          | 0.494   |
| miR-223 | -0.119                                                         | 0.390   | 0.192                                                          | 0.529   |
| miR-27  | -0.006                                                         | 0.967   | 0.063                                                          | 0.846   |
| miR-29  | 0.176                                                          | 0.203   | 0.026                                                          | 0.932   |
| miR-326 | -0.110                                                         | 0.452   | 0.022                                                          | 0.953   |
|         | <b>Cardiac index <math>&gt; 2.2</math> L/min/m<sup>2</sup></b> |         | <b>Cardiac index <math>\leq 2.2</math> L/min/m<sup>2</sup></b> |         |
|         | <b>n = 45</b>                                                  |         | <b>n = 21</b>                                                  |         |
|         | R                                                              | P value | R                                                              | P value |
| ADMA    | 0.064                                                          | 0.678   | -0.019                                                         | 0.934   |
| ANG2    | 0.064                                                          | 0.690   | 0.215                                                          | 0.362   |
| miR-126 | 0.069                                                          | 0.654   | -0.218                                                         | 0.342   |
| miR-132 | -0.154                                                         | 0.337   | 0.405                                                          | 0.076   |
| miR-192 | -0.093                                                         | 0.561   | 0.094                                                          | 0.702   |
| miR-223 | 0.220                                                          | 0.147   | -0.440                                                         | 0.046*  |
| miR-27  | 0.001                                                          | 0.993   | -0.244                                                         | 0.301   |
| miR-29  | 0.032                                                          | 0.834   | 0.290                                                          | 0.202   |
| miR-326 | -0.140                                                         | 0.396   | 0.078                                                          | 0.752   |

Bivariate correlation models were used for the correlation p-values. Numbers of patients in each group is showed by n. \*  $p < 0.05$ , \*\*  $p < 0.01$
